# Supplementary material for: Welche Potenziale und Mehrwerte bieten DiGA für die hausärztliche Versorgung? – Ergebnisse einer Befragung von Hausärzt*innen in Deutschland
Source: Springer Nature journal article supplement (doi:10.1007/s00103-022-03608-w), 2022-10-21
Supplement: MOESM1 [file 23628332]

**1. Seit 2020 gibt es für Ärzt\*innen die Möglichkeit, Patient\*innen digitale Gesundheitsanwendungen, kurz: DiGA, auf Rezept zu verordnen. Als verschreibungsfähige mobile Apps sollen DiGA dabei helfen, Erkrankungen besser zu erkennen und zu behandeln oder die Gesundheitsvorsorge unterstützen. Im Gegensatz zu gewöhnlichen Gesundheits-Apps, die man ohne Rezept bekommt, gelten DiGA als Medizinprodukte. DiGA werden in einem Verfahren des Bundesinstituts für Arzneimittel und Medizinprodukte (BfArM) eingehend geprüft und bei positivem Ergebnis in ein Verzeichnis erstattungsfähiger Programme aufgenommen.**

**War Ihnen bekannt, dass es solche DiGA gibt, oder hören Sie dies zum ersten Mal?**

War mir bekannt  Höre ich zum ersten Mal

**2. Unabhängig davon, ob Ihnen bekannt war, dass es DiGA gibt: Halten Sie solche verschreibungsfähige medizinische Apps grundsätzlich für eine gute Sache, oder stehen Sie dem eher skeptisch gegenüber?**

Gute Sache  Eher Skeptisch  Unentschieden

**3. Wie eingangs erwähnt, werden DiGA in einem systematischen Verfahren des Bundesinstituts für Arzneimittel und Medizinprodukte (BfArM) eingehend geprüft. Dies bedeutet, dass DiGA-Hersteller einen Antrag auf Zulassung stellen müssen und als Voraussetzung für eine Aufnahme in das DiGA-Verzeichnis eine Reihe von Kriterien erfüllt sein müssen, darunter Standards zu Datenschutz und Informationssicherheit, Qualität medizinischer Inhalte, Nutzerfreundlichkeit und Robustheit der Anwendung sowie Patient\*innensicherheit. Nutzen und Mehrwert der Anwendung (Versorgungseffekt) müssen ausreichend belegt werden. (Z.B. kann ein Rückgang von Schmerzen ein positiver Versorgungseffekt sein, aber auch ein größeres Wissen zur Erkrankung, das zu einem besseren Umgang damit führt.)**

**Unabhängig davon, ob Sie schon persönliche Erfahrungen mit DiGA gemacht haben oder nicht: Gehen Sie davon aus, dass solche vom BfArM geprüften digitale Gesundheitsanwendungen verlässliche Programme sind, die man als Ärzt\*in ggf. Patient\*innen empfehlen und verschreiben kann? (Gemeint ist Ihr grundsätzliches Vertrauen, dass durch ein solches Prüfverfahren eine Auswahl an seriösen Programmen geschaffen wird, die bedenkenlos empfohlen werden können.)**

Ich gehe...  stark davon aus  eher davon aus  eher nicht davon aus  überhaupt nicht davon aus  
 Unentschieden

**4. Gehen Sie davon aus, dass es bei der Verschreibung von DiGA und deren Nutzung im Praxiskontext ausreichend Rechtssicherheit für Ärzt\*innen gibt (mit Blick auf Fragen von Risiken und Haftungsfragen)?**

Ich gehe...  stark davon aus  eher davon aus  eher nicht davon aus  überhaupt nicht davon aus  
 Unentschieden

**5. Welchen Beitrag können DiGA Ihrer Meinung oder auch Erfahrung nach zur Gesundheitsvorsorge und/oder Genesung von Patient\*innen – die richtige Anwendung vorausgesetzt – leisten?**

**Ist der Beitrag, den DiGA insgesamt Ihrer Ansicht nach leisten können...**

Sehr groß  Eher groß  Eher gering  Leisten keinen Beitrag

**6. In welchen der folgenden Anwendungsbereiche sind DiGA Ihrer Ansicht nach sinnvoll und können eine positive Wirkung bei Patient\*innen entfalten?**

|                                                                                                                                                                  | Sehr sinnvoll         | Eher sinnvoll         | Weniger bzw. gar nicht sinnvoll | Schwer zu sagen       |
|------------------------------------------------------------------------------------------------------------------------------------------------------------------|-----------------------|-----------------------|---------------------------------|-----------------------|
| Prävention, z.B. Selbstkontrolle von Risikofaktoren (Gewicht, Blutdruck, Blutzucker etc.) oder Gesundheitsdaten (gelaufene Schritte, Trinkmenge, Ernährung etc.) | <input type="radio"/> | <input type="radio"/> | <input type="radio"/>           | <input type="radio"/> |
| Monitoring und Therapie chronischer Erkrankungen (Diabetes, Asthma, Schmerz etc.)                                                                                | <input type="radio"/> | <input type="radio"/> | <input type="radio"/>           | <input type="radio"/> |
| Lifestyle, Einhaltung eines gesundheitsförderlichen Lebensstils (Ernährung, Rauchen, Psyche etc.)                                                                | <input type="radio"/> | <input type="radio"/> | <input type="radio"/>           | <input type="radio"/> |
| Unterstützung von physischen Maßnahmen (Bewegungsübungen in Eigenregie etc.)                                                                                     | <input type="radio"/> | <input type="radio"/> | <input type="radio"/>           | <input type="radio"/> |
| Erinnerung an die regelmäßige Einnahme von Medikamenten, Erinnerung an Impf- und Vorsorgetermine                                                                 | <input type="radio"/> | <input type="radio"/> | <input type="radio"/>           | <input type="radio"/> |
| Sonstiges, und zwar:<br>_____                                                                                                                                    | <input type="radio"/> | <input type="radio"/> | <input type="radio"/>           | <input type="radio"/> |

**7. Welchen der folgenden Aussagen stimmen Sie tendenziell zu? Bitte kreuzen Sie jeweils an.**

- DiGA entlasten Ärzt\*innen und Pflegekräfte, weil diese sich nicht mehr um die Erfassung von Vitaldaten und Messwerten kümmern müssen
- Die Anwendung von DiGA ist für viele Patient\*innen zu kompliziert, wodurch fehlerhafte Gesundheitsdaten gesammelt werden oder im Extremfall Therapien fehlschlagen
- DiGA stärken die Motivation von Patient\*innen, etwas für ihre Gesundheit zu tun
- DiGA geben Patient\*innen das Gefühl, stärker Kontrolle über ihre Gesundheit und Gesunderhaltung zu haben (Empowerment)
- Ich glaube nicht, dass DiGA personenbezogene Daten ausreichend schützen
- Durch die zusätzlichen Informationen, die von DiGA erfasst werden, können Patient\*innen individueller und effektiver behandelt werden
- Die Nutzung von DiGA ist für Patient\*innen und Ärzt\*innen zu zeitaufwändig
- DiGA erleichtern die Kommunikation zwischen Arzt und Patient
- DiGA erzeugen eine Flut von Daten, die einer effektiven Behandlung nicht zweckdienlich sind
- Durch DiGA lassen sich Arztkontakte zeitlich effektiver gestalten
- DiGA stärken die Compliance von Patient\*innen
- Durch DiGA wird das Arzt-Patient-Verhältnis unpersönlicher
- DiGA tragen dazu bei, dass Patient\*innen besser über Gesundheits- und Krankheitsthemen aufgeklärt sind
- Durch den Einsatz von DiGA beim Patienten wird der Arzt stärker belastet als entlastet, weil zusätzliche Aufgaben für ihn anfallen
- Krankheiten und Krankheitsrisiken können aufgrund der Nutzung von DiGA schneller erkannt bzw. diagnostiziert werden
- DiGA führen dazu, dass Patient\*innen ihre Diagnose und Therapie in die eigene Hand nehmen
- Mit DiGA lassen sich neue Patient\*innengruppen erreichen

**8. Gehen Sie davon aus, dass DiGA die Digitalisierung von Gesundheitswesen und Arztpraxen in positiver und sinnvoller Weise voranbringen werden, oder gehen Sie nicht davon aus?**

- Ich gehe...  stark davon aus  eher davon aus  eher nicht davon aus  überhaupt nicht davon aus  
 Schwer zu sagen

**9. Haben Sie bereits DiGA bei Patient\*innen verschrieben, oder haben Sie dies in kommender Zeit vor, können Sie sich dies grundsätzlich vorstellen, oder kommt eine Verschreibung von DiGA grundsätzlich nicht für Sie in Frage?**

- Bereits verschrieben    Habe ich vor => Bitte direkt übergehen zu Frage 17  
 Kann ich mir vorstellen => Bitte direkt übergehen zu Frage 17  
 Kommt grundsätzlich nicht in Frage => Bitte direkt übergehen zu Frage 18

**10. Sie haben angegeben, dass Sie DiGA bereits eingesetzt bzw. Patient\*innen verschrieben haben. Hierzu möchten wir Ihnen im Folgenden einige Fragen zu Ihren bisherigen Erfahrungen stellen.**

**Wie oft ist es bereits vorgekommen, dass Sie im Gespräch mit Patient\*innen die Möglichkeit einer Unterstützung durch Gesundheits-Apps oder DiGA zur Unterstützung der Vorsorge oder Krankheitsbewältigung von sich aus angesprochen haben?**

- Häufig    Gelegentlich    Selten    Nie    Schwer zu sagen, weiß nicht

**11. Wie häufig ist es bereits vorgekommen, dass Sie Patient\*innen die Nutzung von bestimmten Gesundheits-Apps zur Prävention und/oder Therapie empfohlen haben?** (Gemeint sind nicht nur DiGA, sondern alle Arten von Gesundheits-Apps.)

- Häufig    Gelegentlich    Selten    Nie    Schwer zu sagen, weiß nicht

**12. In welchen Anwendungsbereichen haben Sie DiGA bei Ihren Patient\*innen eingesetzt? Bitte geben Sie für den oder die jeweiligen Anwendungsbereich auch an, wie Sie den Nutzen der von Ihnen eingesetzten DiGA insgesamt beurteilen.**

|                                                                                                                                                                  | Eingesetzt            | Falls eingesetzt,...  |                       |                                 |
|------------------------------------------------------------------------------------------------------------------------------------------------------------------|-----------------------|-----------------------|-----------------------|---------------------------------|
|                                                                                                                                                                  |                       | Sehr nützlich         | Eher nützlich         | Weniger bzw. gar nicht nützlich |
| Prävention, z.B. Selbstkontrolle von Risikofaktoren (Gewicht, Blutdruck, Blutzucker etc.) oder Gesundheitsdaten (gelaufene Schritte, Trinkmenge, Ernährung etc.) | <input type="radio"/> | <input type="radio"/> | <input type="radio"/> | <input type="radio"/>           |
| Monitoring und Therapie chronischer Erkrankungen (Diabetes, Asthma, Schmerz etc.)                                                                                | <input type="radio"/> | <input type="radio"/> | <input type="radio"/> | <input type="radio"/>           |
| Lifestyle, Einhaltung eines                                                                                                                                      |                       |                       |                       |                                 |

|                                                                                                        |                       |                       |                       |                       |
|--------------------------------------------------------------------------------------------------------|-----------------------|-----------------------|-----------------------|-----------------------|
| gesundheitsförderlichen Lebensstils<br>(Ernährung, Rauchen, Psyche etc.)                               | <input type="radio"/> | <input type="radio"/> | <input type="radio"/> | <input type="radio"/> |
| Unterstützung von physischen Maßnahmen<br>(Bewegungsübungen in Eigenregie etc.)                        | <input type="radio"/> | <input type="radio"/> | <input type="radio"/> | <input type="radio"/> |
| Erinnerung an die regelmäßige Einnahme von<br>Medikamenten, Erinnerung an Impf- und<br>Vorsorgetermine | <input type="radio"/> | <input type="radio"/> | <input type="radio"/> | <input type="radio"/> |
| Sonstiges, und zwar:<br>_____                                                                          | <input type="radio"/> | <input type="radio"/> | <input type="radio"/> | <input type="radio"/> |

**13. Falls Sie dies noch wissen: Welche DiGA haben Sie Patient\*innen vor allem verschrieben? Bitte nennen Sie nach Möglichkeit 1-3 Beispiele.**

---

---

**14. Hier stehen positive Effekte für den Gesundheitszustand. Was davon haben Sie bereits als Ergebnis einer DiGA-Nutzung Ihrer Patient\*innen beobachtet? (Mehrfachnennung möglich)**

- Verbesserung von Gesundheitsbewusstsein und Aufklärung
- Steigerung der Compliance (z.B. Medikamenteneinnahme, Therapieadhärenz)
- Verbesserung des Selbstmanagements (z.B. bei chronischen Erkrankungen)
- Gewichtsreduktion (z.B. BMI, Bauchumfang, Taillenumfang)
- Stabile Abnahme des Blutzuckers (HbA1c)
- Rückgang des metabolischen Syndroms
- Rückgang von psychischen Problemen oder Begleitscheinungen (z.B. Depression)
- Abwehr von Folgeschäden (z.B. diabetisches Fußsyndrom, KHK)
- Verringern von Komplikationen (z.B. Hypoglykämie)
- Vermeiden von steigernden Therapieoptionen (z.B. Insulintherapie)
- Steigerung der Mobilität
- Vollständige Heilung
- Sonstiges: \_\_\_\_\_

**15. Wenn Sie Ihre bisherige Erfahrung mit DiGA nehmen: Was sollte weiter rund um DiGA verbessert werden, was würden Sie sich wünschen?** (Bitte geben Sie hier Ihre kritische Rückmeldung ab.)

---

---

---

**16. Einmal angenommen, die von Ihnen angegebenen Punkte würden umgesetzt: Wären Sie unter diesen Voraussetzungen bereit, DiGA in der Patientenversorgung stärker als bislang zu berücksichtigen?**

Ja, deutlich stärker    Ja, etwas stärker    Nein    Habe keine weiteren Wünsche angegeben

⇒ Bitte gehen Sie direkt über zu [Frage 18](#)

**17. Sie haben angegeben, dass Sie DiGA bislang noch nicht eingesetzt haben. In welchen der folgenden Anwendungsbereiche wäre es für Sie vorstellbar, DiGA künftig einzusetzen?**

|                                                                                                                                                                  | Sehr gut vorstellbar  | Eher gut vorstellbar  | Weniger bzw. gar nicht gut vorstellbar |
|------------------------------------------------------------------------------------------------------------------------------------------------------------------|-----------------------|-----------------------|----------------------------------------|
| Prävention, z.B. Selbstkontrolle von Risikofaktoren (Gewicht, Blutdruck, Blutzucker etc.) oder Gesundheitsdaten (gelaufene Schritte, Trinkmenge, Ernährung etc.) | <input type="radio"/> | <input type="radio"/> | <input type="radio"/>                  |
| Monitoring und Therapie chronischer Erkrankungen (Diabetes, Asthma, Schmerz etc.)                                                                                | <input type="radio"/> | <input type="radio"/> | <input type="radio"/>                  |
| Lifestyle, Einhaltung eines gesundheitsförderlichen Lebensstils (Ernährung, Rauchen, Psyche etc.)                                                                | <input type="radio"/> | <input type="radio"/> | <input type="radio"/>                  |
| Unterstützung von physischen Maßnahmen (Bewegungsübungen in Eigenregie etc.)                                                                                     | <input type="radio"/> | <input type="radio"/> | <input type="radio"/>                  |
| Erinnerung an die regelmäßige Einnahme von Medikamenten, Erinnerung an Impf- und Vorsorgetermine                                                                 | <input type="radio"/> | <input type="radio"/> | <input type="radio"/>                  |

**18. Was muss bzw. müsste eine DiGA Ihrer Ansicht nach erfüllen, damit Sie diese Patient\*innen empfehlen?**

**Was ist Ihnen besonders wichtig? Bitte nennen Sie 1-5 Kriterien.**

---

---

**19. Was schätzen Sie: Wie viele Ihrer Patient\*innen nutzen wenigstens zeitweise Gesundheits-Apps und/oder andere digitale Tools zur gesundheitlichen Vorsorge bzw. zum Krankheitsmanagement?**

Weniger als 5%  5-10%  10-15%  15-20%  20-25%  Mehr als 25%  Weiß nicht

**20. Wenn Sie Ihre Patientenschaft insgesamt betrachten: Was schätzen Sie, wie viele Patient\*innen grundsätzlich daran interessiert wären, DiGA zur Vorsorge oder Krankheitsbewältigung zu nutzen?**

ca. \_\_\_\_\_ %

**21. Wie häufig ist es bereits vorgekommen, dass Sie von Patient\*innen auf DiGA angesprochen wurden?**

Häufig  Gelegentlich  Selten  Nie

**22. Ist es Ihrer Ansicht nach in Ordnung, wenn man sich als Arzt bei der Therapieplanung prinzipiell auf vom Patienten mittels Gesundheits-Apps erfasste Daten verlässt, oder sind solche Daten Ihrer Ansicht nach für die Therapieplanung kritisch zu sehen?**

In Ordnung  Kritisch zu sehen  Schwer zu sagen

**23. Wie häufig kommt es vor, dass Sie sich über DiGA, Gesundheits-Apps und/oder andere digitale Tools informieren?**

Häufig  Gelegentlich  Selten  Nie => Bitte übergehen zu Frage 25

**24. Über welche Quellen (z.B. Internetseiten) informieren Sie sich schon mal darüber?**

---

---

**25. Wie schätzen Sie Ihr Wissen bzw. Ihre Kompetenz ein, wenn es darum geht, das Angebot an verfügbaren Gesundheits-Apps und anderen digitalen Tools zu überblicken?**

Sehr gut  Eher gut  Weniger gut  Gar nicht gut

**26. Wie schätzen Sie Ihr Wissen bzw. Ihre Kompetenz ein, wenn es darum geht, gute von schlechten Gesundheits-Apps zu unterscheiden?**

- Sehr gut  Eher gut  Weniger gut  Gar nicht gut

**27. Wie schätzen Sie Ihr Wissen bzw. Ihre Kompetenz ein, wenn es darum geht, Patient\*innen zu Gesundheits-Apps und anderen digitalen Tools, etwa zur Prävention und/oder Therapie, zu beraten?**

- Sehr gut  Eher gut  Weniger gut  Gar nicht gut

*Nun bräuchten wir noch einige statistische Angaben von Ihnen. Wie auch der Rest des Fragebogens werden diese Informationen natürlich streng vertraulich behandelt und anonymisiert.*

**Sind sind...**

- Männlich  Weiblich  Divers

Ihr **Alter**: \_\_\_\_\_

**Wo befindet sich Ihre Praxis?** In einer Gemeinde/Stadt mit . . .

- mehr als 100.000  20.000 bis 100.000  5.000 bis 20.000  unter 5.000 Einwohnern

**Welches Niederlassungsmodell** beschreibt Ihre Praxis am besten?

- Einzelpraxis (Sie sind der/die einzige Arzt/Ärztin)  Einzelpraxis mit angestellten Ärzten  
 Gemeinschaftspraxis  Medizinisches Versorgungszentrum  Sonstiges

**Wie viele Patient\*innen** behandelt Ihre Praxis im Quartal?

- 500 bis 750  751 bis 1000  1001 bis 1500  1501 bis 2000  Mehr als 2000

**Vielen Dank für Ihre Teilnahme!**

Was möchten Sie uns noch mitteilen? Hier finden Sie Platz für Anregungen, Kommentare und Kritik.

---

---
